# Supplementary material
Source: publisher site journal article supplement (https://www.dovepress.com/get_supplementary_file.php?f=314090.docx)
Supplement: Supplementary file 1 [file get_supplementary_file.php]

**Table 1S** Number of required samples and actual samples participating in the survey

| National | Sex | Age (years) | Total number from BRC# list | Total samples required | Total participants attending the survey* |
| --- | --- | --- | --- | --- | --- |
| Afghan | Male | 0-15 | 23 | 2 | 1 |
| Afghan | Male | >15 | 26 | 2 | 3 |
| Afghan | Female | 0-15 | 16 | 2 | 1 |
| Afghan | Female | >15 | 45 | 2 | 2 |
| Cambodian | Male | 0-15 | 30 | 2 | 2 |
| Cambodian | Male | >15 | 72 | 4 | 4 |
| Cambodian | Female | 0-15 | 39 | 3 | 1 |
| Cambodian | Female | >15 | 57 | 4 | 4 |
| Chinese | Male | 0-15 | 2 | 1 | 2 |
| Chinese | Male | >15 | 22 | 2 | 1 |
| Chinese | Female | 0-15 | 14 | 2 | 1 |
| Chinese | Female | >15 | 13 | 2 | 0 |
| Iraqi | Male | 0-15 | 12 | 2 | 0 |
| Iraqi | Male | >15 | 32 | 2 | 2 |
| Iraqi | Female | 0-15 | 25 | 2 | 1 |
| Iraqi | Female | >15 | 28 | 2 | 3 |
| Sri Lankan | Male | 0-15 | 13 | 2 | 2 |
| Sri Lankan | Male | >15 | 30 | 2 | 0 |
| Sri Lankan | Female | 0-15 | 31 | 2 | 2 |
| Sri Lankan | Female | >15 | 21 | 2 | 2 |
| Pakistani | Male | 0-15 | 243 | 15 | 14 |
| Pakistani | Male | >15 | 392 | 25 | 22 |
| Pakistani | Female | 0-15 | 275 | 18 | 13 |
| Pakistani | Female | >15 | 318 | 20 | 23 |
| Palestinian | Male | 0-15 | 37 | 2 | 1 |
| Palestinian | Male | >15 | 56 | 4 | 0 |
| Palestinian | Female | 0-15 | 33 | 2 | 1 |
| Palestinian | Female | >15 | 52 | 2 | 3 |
| Somali | Male | 0-15 | 40 | 2 | 2 |
| Somali | Male | >15 | 72 | 5 | 1 |
| Somali | Female | 0-15 | 29 | 2 | 2 |
| Somali | Female | >15 | 20 | 2 | 5 |
| Vietnamese | Male | 0-15 | 183 | 11 | 9 |
| Vietnamese | Male | >15 | 250 | 16 | 13 |
| Vietnamese | Female | 0-15 | 197 | 13 | 11 |
| Vietnamese | Female | >15 | 231 | 15 | 12 |
| Syrian | Male | 0-15 | 9 | 2 | 0 |
| Syrian | Male | >15 | 12 | 2 | 3 |
| Syrian | Female | 0-15 | 11 | 2 | 2 |
| Syrian | Female | >15 | 10 | 2 | 1 |

Note: *Nine participants (one Chinese female, one Chinese male, one Palestinian male, there Vietnamese males and three Vietnamese females) attended the survey but were not displayed on the table due to incomeplte age and sex data. In total, there were 181 URAS (172 participants shown in the last column of the table and nine URAS with in complete age and sex data). #BRC = Bangkok Refugee Center

**Table 2S** Demographic characteristics of missing data in access to NCD care group and non-missing data in access to NCD care group

| Variable | missing data  in access to NCD care | non-missing data  in access to NCD care |
| --- | --- | --- |
| Sex—n (%) |  |  |
| - Female | 129 (57.1) | 244 (58.7) |
| - Male | 97 (42.9) | 172 (41.3) |
| Education—n (%) |  |  |
| - Up to primary | 111 (49.3) | 221 (53.6) |
| - Up to secondary | 72 (32.0) | 114 (27.7) |
| - Degree or above | 765 (18.7) | 77 (18.7) |
| Religious—n (%) |  |  |
| - Buddhism | 222 (98.2) | 400 (96.2) |
| - Christ | 1 (0.5) | 1 (0.2) |
| - Muslim | 3 (1.3) | 15 (3.6) |
| - Others | 0 (0.0) | 0 (0.0) |
| Median age—years (P25, P75) | 61.5 (51.0, 70.0) | 62 (54.0, 71.0) |
| Age group—n (%) |  |  |
| - 15 years | 4 (1.8) | 10 (2.4) |
| - 15 but 60 years | 103 (45.6) | 172 (41.4) |
| - 60 years | 119 (52.6) | 234 (56.2) |
| Median household income—Baht (P25, P75) | 30,000 (15,000, 45,000) | 27,000 (15,000, 48,000) |
| Household economy |  |  |
| - Above average | 144 (63.7) | 249 (59.9) |
| - Below average | 82 (36.3) | 167 (40.1) |
| Insurance status |  |  |
| - Uninsured | 0 (0.0) | 0 (0.0) |
| - Insured | 226 (100.0) | 416 (100.0) |

**Table 3S** Factors associated with NCD care access with interaction term

| Factors | Multivariable logistic regression | | |
| --- | --- | --- | --- |
| Adjusted OR  (95% CI) | P-value |
| Insured (v uninsured) | 4.5 (0.1-138.0) | 0.393 |
| Age group (v 15 years) |  |  |
| - 15 but 60 years | 2.8 (0.2-37.1) | 0.425 |
| - 60 years | 1.5 (0.1-29.3) | 0.784 |
| Insured##Age group |  |  |
| - Insured##15 but 60 years | 0.3 (0.0-8.0) | 0.455 |
| - Insured##60 years | 1.2 (0.0-46.2) | 0.939 |
| Religious (v Buddhist) |  |  |
| - Christ | 0.4 (0.1-1.9) | 0.240 |
| - Muslim | 0.6 (0.2-1.9) | 0.376 |
| Education level (v primary education) |  |  |
| - Secondary education | 1.2 (0.6-2.3) | 0.578 |
| - Degree of above | 2.1 (0.9-4.7) | 0.090 |
| Below-average household monthly income  (v about-or-above average) | 0.8 (0.4-1.4) | 0.444 |
